# Supplementary material
Source: Research Square preprint supplement (doi:10.21203/rs.3.rs-9841293/v1)
Supplement: Supplementary file 2 [file a556e3c7ed9f198f1f830bb1.xlsx]

## Sheet: S1
Table S1. Results of the Kato-Katz and copro-DNA-SjTR1-qPCR systems
#	KK (Schistosoma japonicum EPG)	DNA concentration (SjTR1-qPCR-S1)	DNA concentration (SjTR1-qPCR-S2)	Ct value (SjTR1-qPCR-S1)	Ct value (SjTR1-qPCR-S2)
EA001	240	757.065	186.1	20.9276	19.7764
EA002	3.33333	418.003	381.9	26.2057	22.5138
EA003	0	192.22	140.4	Neg	Neg
EA004	0	324.319	398.3	Neg	Neg
EA005	0	383.719	268	Neg	Neg
EA006	6.66667	478.469	376.3	23.8011	21.0644
EA007	0	223.336	295.2	Neg	Neg
EA008	13.3333	306.143	392.4	26.1384	21.3733
EA009	0	351.434	283.6	Neg	Neg
EA010	0	531.147	125.6	Neg	25.8814
EA011	10	517.135	192.7	Neg	Neg
EA012	0	433.117	170.9	Neg	Neg
EA013	0	438.374	419.6	Neg	Neg
EA014	0	497.515	393.5	Neg	Neg
EA015	3.33333	270.63	118.3	Neg	Neg
EA016	0	474.362	415.8	Neg	Neg
EA017	0	793.747	318.2	Neg	Neg
EA018	0	537.411	236.1	Neg	Neg
EA019	0	497.969	192.4	23.5864	23.8422
EA020	3.33333	2393.62	444.7	Neg	22.0991
EA021	0	406.457	357.4	Neg	Neg
EA022	0	409.038	188.7	Neg	Neg
EA023	0	848.894	107.5	Neg	Neg
EA024	3.33333	939.29	242.5	Neg	Neg
EA025	0	445.126	275	Neg	Neg
EA026	0	316.669	192.9	Neg	33.4077
EA027	0	661.542	383.1	Neg	Neg
EA028	0	740.222	414.4	Neg	31.7282
EA029	93.3333	421.826	183.2	19.2431	15.3298
EA030	0	732.794	511.5	Neg	Neg
EA031	3.33333	699.695	471.4	Neg	Neg
EA032	43.3333	605.313	436.1	24.5567	18.6936
EA033	10	238.01	233.3	35.1039	27.247
EA034	0	714.603	335.4	Neg	Neg
EA035	0	391.249	198.5	Neg	Neg
EA036	0	531.253	288.7	Neg	Neg
EA037	0	235.407	114	Neg	Neg
EA038	0	181.935	94.5	Neg	Neg
EA039	0	1292.74	481.1	Neg	Neg
EA040	0	475.397	362.5	Neg	Neg
EA041	0	348.227	91	Neg	Neg
EA042	26.6667	491.945	457.9	22.637	17.7576
EA043	0	132.796	120.9	Neg	Neg
EA044	0	486.905	323.3	Neg	Neg
EA045	13.3333	1034.78	294.1	23.5623	27.6749
EA046	5	637.17	486.2	Neg	Neg
EA047	20	368.368	121.2	20.0736	18.0644
EA048	0	228.337	289.8	Neg	Neg
EA049	0	903.542	336.9	Neg	Neg
EA050	13.3333	179.59	121	Neg	Neg
EA051	0	1106	158.9	Neg	Neg
EA052	0	377.769	415.6	Neg	Neg
EA053	0	508.765	350.2	Neg	Neg
EA054	3.33333	381.785	327	Neg	Neg
EA055	0	252.342	35.6	Neg	Neg
EA056	0	491.451	189.3	Neg	Neg
EA057	6.66667	479.16	193.5	21.6645	18.3012
EA058	0	1837.6	34.2	Neg	Neg
EA059	6.66667	1624.61	99.2	22.8856	26.2992
EA060	0	218.922	191.3	Neg	Neg
EA061	0	539.041	40.8	Neg	Neg
EA062	10	930.876	537.7	23.926	19.3281
EA063	0	565.924	192.6	Neg	Neg
EA064	0	271.659	357.8	Neg	Neg
EA065	0	2844.74	509.9	Neg	Neg
EA066	0	581.648	181.9	Neg	Neg
EA067	0	365.068	347.1	Neg	Neg
EA068	0	488.042	564.2	Neg	Neg
EA069	3.33333	63.558	77.9	24.5561	24.8036
EA070	40	249.328	264.6	27.1695	22.8699
EA071	0	641.898	287.2	23.0098	25.3849
EA072	0	757.181	273.2	Neg	Neg
EA073	0	446.566	105.6	Neg	Neg
EA074	10	764.108	379.2	26.0442	19.3946
EA075	6.66667	881.745	483.7	24.5536	18.718
EA076	0	619.373	435.6	Neg	Neg
EA077	0	1577.56	607.8	Neg	Neg
EA078	0	671.108	185.8	Neg	Neg
EA079	0	603.42	115.2	Neg	Neg
EA080	0	610.569	320.9	Neg	Neg
EA081	20	171.881	242.1	28.0705	24.7532
EA082	0	474.719	206.2	Neg	Neg
EA083	0	1012.99	288.1	Neg	Neg
EA084	3.33333	280.303	212.7	24.8834	23.132
EA085	0	523.784	294.7	Neg	30.4148
EA086	0	1378.18	542.8	Neg	Neg
EA087	0	674.231	131.6	Neg	Neg
EA088	0	664.099	436.3	Neg	Neg
EA089	3.33333	258.225	120.8	Neg	23.425
EA090	0	964.618	225.4	Neg	Neg
EA091	0	135.416	456.1	Neg	Neg
EA092	0	215.008	162.2	Neg	Neg
EA093	0	764.93	81.9	Neg	Neg
EA094	0	687.343	375.4	22.1041	Neg
EA095	6.66667	1073.14	594.7	Neg	22.0932
EA096	10	636.962	228.5	23.2065	20.1567
EA097	0	849.923	597.2	Neg	Neg
EA098	0	1189.9	563.7	Neg	Neg
EA099	0	609.168	286.7	Neg	Neg
EA100	6.66667	842.22	499.2	Neg	Neg
EA101	0	824.849	354.6	Neg	Neg
EA102	0	273.167	373	Neg	Neg
EA103	0	380.358	237.6	31.8884	22.3493
EA104	0	473.422	69.7	Neg	Neg
EA105	0	365.395	98.6	Neg	Neg
EA106	0	476.679	476.6	Neg	Neg
EA107	0	499.999	427.3	Neg	Neg
EA108	0	208.314	313.1	Neg	Neg
EA109	0	963.098	203.1	Neg	Neg
EA110	0	381.995	383.5	Neg	Neg
EA111	0	597.409	521.8	25.1536	20.8826
EA112	6.66667	354.55	655.3	22.329	26.5927
EA113	0	724.328	216.5	33.7576	34.8373
EA114	0	470.456	415.7	Neg	Neg
EA115	0	232.741	560.7	Neg	33.5787
EA116	0	946.761	525.3	Neg	21.4348
EA117	0	636.637	164.1	Neg	Neg
EA118	0	398.157	219.1	Neg	31.37
EA119	3.33333	2687.91	398.7	Neg	Neg
EA120	0	541.502	294.6	Neg	34.673
EA121	0	1585.41	528.6	Neg	Neg
EA122	0	392.563	472.9	Neg	Neg
EA123	0	888.308	193.2	Neg	Neg
EA124	3.33333	448.3	150.1	22.3902	21.4126
EA125	0	1221.25	908.4	Neg	Neg
EA126	0	660.103	415.1	Neg	Neg
EA127	0	675.928	358.6	25.5731	19.2204
EA128	56.6667	421.512	253.4	22.4004	18.5629
EA129	30	385.623	445.6	21.4339	19.3249
EA130	6.66667	1486.07	165.2	Neg	Neg
EA131	0	2580.46	673.6	Neg	Neg
EA132	0	519.199	415.1	Neg	Neg
EA133	0	443.023	404.4	Neg	21.7921
EA134	0	606.886	372.2	Neg	Neg
EA135	0	1198.2	755.4	Neg	Neg
EA136	0	958.442	656.7	Neg	27.4863
EA137	0	280.745	150.8	Neg	Neg
EA138	33.3333	850.097	659.1	22.2284	17.264
EA139	0	1187.87	874.9	Neg	34.2753
EA140	0	105.553	292	Neg	Neg
EA141	0	1000.09	200.6	Neg	27.1573
EA142	0	1144.89	292.1	Neg	Neg
EA143	0	685.751	229.4	Neg	Neg
EA144	3.33333	828.431	638	27.5241	19.7347
EA145	90	811.315	53.2	19.9143	20.1218
EA146	0	581.212	263.5	Neg	Neg
EA147	0	1474.27	614.1	Neg	Neg
EA148	0	358.218	503.9	Neg	Neg
EA149	0	599.592	618.5	Neg	Neg
EA150	0	309.705	595.7	Neg	Neg
EA151	56.6667	904.201	874.6	25.6098	22.035
EA152	0	1041.42	586	Neg	Neg
EA153	16.6667	728.568	693.7	28.851	Neg
EA154	10	360.359	274.4	23.3015	21.8468
EA155	413.333	1697.94	496.2	19.0235	18.7148
EA156	26.6667	586.247	783	18.1257	14.9028
EA157	3.33333	271.055	91.6	Neg	Neg
EA158	3.33333	2236.03	272.5	Neg	Neg
EA159	0	187.739	559.9	Neg	34.9867
EA160	0	600.751	562.4	Neg	Neg
EA161	0	873.299	661.7	Neg	Neg
EA162	6.66667	456.073	179.5	24.6115	21.5835
EA163	0	664.25	198.7	Neg	Neg
EA164	0	479.669	279.3	29.561	32.7772
EA165	0	429.746	530	Neg	Neg
EA166	390	502.125	216.7	17.8985	15.3406
EA167	73.3333	814.831	258.1	20.7373	18.1321
EA168	0	305.975	43.4	Neg	Neg
EA169	0	362.737	345.6	Neg	Neg
EA170	40	1157.27	904.4	23.1743	22.7731
EA171	0	718.265	98.4	Neg	Neg
EA172	0	397.007	434.7	Neg	Neg
EA173	0	1482.98	775.6	Neg	Neg
EA174	3.33333	452.624	404.3	29.1155	21.398
EA175	26.6667	288.379	423.1	25.8025	26.3155
EA176	10	1769.01	697.2	23.4123	23.4141
EA177	6.66667	1120.29	199.4	Neg	Neg
EA178	3.33333	151.307	412.8	26.4848	23.9961
EA179	0	773.363	422.4	Neg	Neg
EA180	150	1015.08	465.8	20.4416	18.5189
EA181	0	299.884	78.5	Neg	Neg
EA182	0	200.235	703.9	Neg	Neg
EA183	3.33333	1975.24	267.7	Neg	Neg
EA184	0	332.366	412	Neg	Neg
EA185	0	843.399	500.6	Neg	Neg
EA186	0	3207.74	379.2	Neg	Neg
EA187	0	544.915	259.5	Neg	Neg
EA188	0	922.495	357.7	Neg	Neg
EA189	150	673.574	367.7	20.5091	22.483
EA190	3.33333	936.155	309.5	Neg	Neg
EA191	43.3333	141.134	34.4	20.6708	27.4507
EA192	0	775.827	263.7	Neg	Neg
EA193	0	557.642	155.4	22.8626	21.5303
EA194	0	302.195	106	Neg	Neg
EA195	3.33333	806.63	217.8	Neg	Neg
EA196	0	733.083	475.6	Neg	Neg
EA197	30	416.652	51.5	24.0113	20.9915
EA198	0	502.81	447.7	Neg	Neg
EA199	0	1407.02	346.7	Neg	Neg
EA200	0	648.556	925.8	Neg	Neg
EA201	3.33333	770.29	738.3	Neg	Neg
EA202	0	1676.47	63	Neg	Neg
EA203	10	419.043	229.6	23.6893	20.9573
EA204	0	660.978	106.2	Neg	Neg
EA205	0	390.323	144.6	Neg	Neg
EA206	0	1425.91	246.4	Neg	Neg
EA207	0	204.628	135.2	Neg	22.7321
EA208	0	1675.29	612.6	Neg	Neg
EA209	0	1107.84	47.1	Neg	Neg
EA210	0	837.746	484.4	Neg	Neg
EA211	1060	1131.24	254	21.3537	18.941
EA212	0	405.755	245.8	Neg	Neg
EA213	0	1423.42	465.5	Neg	Neg
EA214	3.33333	437.87	174.2	Neg	Neg
EA215	73.3333	848.589	140.3	19.1162	20.0002
EA216	40	549.587	494.5	18.4816	14.6126
EA217	0	221.319	390.3	Neg	Neg
EA218	0	2079.48	823.9	Neg	Neg
EA219	0	2651.76	658.4	Neg	Neg
EA220	0	346.925	396.9	Neg	Neg
EA221	0	1226.32	820.7	24.4359	Neg
EA222	10	355.58	711.4	Neg	Neg
EA223	0	1407.6	375.8	Neg	Neg
EA224	0	79.74	19.2	Neg	Neg
EA225	0	1700.49	389.6	26.3911	28.5637
EA226	46.6667	1080.87	373.4	18.22	20.9778
EA227	0	1446.4	475.9	Neg	Neg
EA228	0	411.184	360	Neg	Neg
EA229	0	914.848	878.6	Neg	Neg
EA230	70	659.125	375.4	19.7213	18.002
EA231	0	726.384	541.1	Neg	Neg
EA232	0	300.419	334.4	21.867	20.5797
EA233	0	820.644	614.6	Neg	Neg
EA234	15	685.752	626.4	21.4377	23.8463
EA235	0	1106.68	488.5	26.3328	26.7357
EA236	3.33333	599.98	311.5	Neg	Neg
EA237	0	442.401	296.6	27.9857	26.0091
EA238	0	1579.94	452.7	Neg	Neg
EA239	0	675.477	427.7	Neg	Neg
EA240	0	878.666	537.4	Neg	Neg
EA241	6.66667	583.524	654.8	26.2165	22.1313
EA242	0	424.735	148.7	Neg	Neg
EA243	0	1278.19	492.9	Neg	Neg
EA244	0	846.49	235.2	Neg	Neg
EA245	0	454.731	307.1	Neg	Neg
EA246	0	206.991	112.6	Neg	Neg
EA247	26.6667	408.743	372	25.2602	21.0944
EA248	0	701.067	586	Neg	19.8351
EA249	0	94.541	154.5	Neg	Neg
EA250	0	393.906	53.5	Neg	Neg
EA251	0	608.322	481.6	25.2644	22.9516
EA252	0	619.535	318.8	Neg	Neg
EA253	0	1142.32	355.3	Neg	Neg
EA254	0	798.735	197.8	Neg	Neg
EA255	0	1319.21	529.6	Neg	Neg
EA256	0	698.268	443.8	24.7079	Neg
EA257	0	258.123	59.4	Neg	Neg
EA258	0	1323.86	126.2	Neg	Neg
EA259	0	216.217	115.3	Neg	Neg
EA260	0	398.666	93.3	Neg	Neg
EA261	0	1358.65	125.7	Neg	Neg
EA262	0	376.489	242.9	Neg	Neg
EA263	0	301.172	100	Neg	Neg
EA264	0	304.718	139.8	Neg	Neg
EA265	10	534.07	157	Neg	34.6978
EA266	0	404.532	260.6	26.1369	28.1023
EA267	0	422.944	398.4	Neg	Neg
EA268	0	193.31	191.7	Neg	Neg
EA269	0	688.064	103.7	Neg	34.3702
EA270	0	1252.07	80	Neg	Neg
EA271	0	471.845	363.4	25.2468	19.6336
EA272	0	525.352	220.4	Neg	Neg
EA273	0	527.332	422.6	Neg	Neg
EA274	10	191.087	350.9	Neg	Neg
EA275	33.3333	264.924	23.2	21.693	23.4136
EA276	0	730.618	158.5	Neg	Neg
EA277	0	235.507	149.2	Neg	Neg
EA278	0	1349.77	326.1	Neg	Neg
EA279	0	255.174	298.5	Neg	Neg
EA280	0	300.235	132.5	Neg	Neg
EA281	0	267.013	158.9	Neg	Neg
EA282	0	216.123	70.2	22.2182	24.9629
EA283	90	4312.43	224	20.994	Neg
EA284	0	3103.74	263.2	Neg	Neg
EA285	383.333	843.944	157	20.953	19.4541
EA286	156.667	631.484	160.7	18.9477	16.6134
EA287	0	222.725	503.4	Neg	Neg
EA288	123.333	1733.21	212.6	18.9311	16.9223
EA289	0	228.777	101.5	Neg	Neg
EA290	0	201.885	131.5	Neg	34.4168
EA291	0	525.675	65.2	Neg	Neg
EA292	6.66667	457.616	386.9	26.0021	20.1229
EA293	0	310.329	82.7	Neg	Neg
EA294	0	602.648	300.2	Neg	Neg
EA295	13.3333	393.105	325.3	23.5741	28.769
EA296	0	253.327	121.1	24.3478	Neg
EA297	0	251.48	253.2	Neg	Neg
EA298	0	601.118	603.4	Neg	Neg
EA299	83.3333	509.511	255.8	23.5572	18.207
EA301	16.6667	588.477	386.3	21.6628	17.8352
EA302	6.66667	629.655	163.5	Neg	Neg
EA303	0	111.205	117	Neg	Neg
EA304	0	910.515	174.9	Neg	Neg
EA305	0	206.417	80.3	Neg	Neg
EA306	0	44.865	50.3	Neg	Neg
EA307	0	325.8	138.3	Neg	Neg
EA308	0	883.481	86	Neg	Neg
EA309	0	989.436	120.9	Neg	34.6211
EA310	30	1198.65	164.3	32.279	24.2272
EA311	0	1544.57	188.4	Neg	Neg
EA312	53.3333	2147.1	198	20.1118	21.6735
EA313	0	233.381	370.6	Neg	Neg
EA314	0	409.344	131.5	30.9909	18.8249
EA315	0	274.929	80.5	Neg	Neg
EA316	13.3333	589.973	96.8	21.7215	18.8545
EA317	0	547.837	149.4	Neg	Neg
EA318	250	467.105	307.7	19.3498	18.4621
EA319	0	1105.32	77.6	Neg	Neg
EA320	0	619.825	205.3	Neg	Neg
EA321	0	869.855	372.8	Neg	Neg
EA322	0	356.001	58.5	Neg	Neg
EA323	0	1148.65	141.9	Neg	Neg
EA324	0	747.8	208.7	Neg	Neg
EA325	6.66667	866.86	42.2	21.735	20.5761
EA326	56.6667	779.845	216.1	28.7895	23.9572
EA327	0	1120.06	75.5	Neg	Neg
EA328	16.6667	462.599	116.4	24.6455	19.0915
EA329	13.3333	464.535	346.5	Neg	26.6513
EA330	0	866.708	286.4	Neg	Neg
EA331	0	969.579	391.9	Neg	Neg
EA332	0	161.244	85.5	Neg	Neg
EA333	0	773.142	231.9	35.0348	21.369
EA334	50	422.849	336.5	21.9251	20.3117
EA335	0	696.092	203.3	Neg	Neg
EA336	20	348.039	96.3	24.0324	21.9124
EA337	0	617.682	119.2	Neg	Neg
EA338	0	948.509	334.8	Neg	Neg
EA339	0	114.383	264.2	Neg	Neg
EA340	0	623.603	431	Neg	Neg
EA341	0	306.775	247.8	24.7759	22.5286
EA342	0	714.6	84.1	Neg	Neg
EA343	0	270.666	218.4	Neg	Neg
EA344	0	582.694	282.2	Neg	Neg
EA345	0	458.627	252	Neg	Neg
EA346	0	510.436	75.4	21.8591	Neg
EA347	0	931.622	537.7	Neg	Neg
EA348	0	332.685	380.8	Neg	Neg
EA349	0	224.115	332.3	Neg	Neg
EA351	0	224.927	115.8	Neg	Neg
EA352	0	876.346	165.8	Neg	Neg
EA353	0	311.979	533	Neg	Neg
EA354	6.66667	573.98	191.1	Neg	Neg
EA355	0	299.966	484	Neg	Neg
EA356	6.66667	1560.79	385.7	22.139	25.0087
EA357	0	152.13	134	Neg	Neg
EA358	0	394.618	332.2	Neg	Neg
EA359	0	297.091	105.8	Neg	Neg
EA360	0	68.964	41.7	Neg	Neg
EA361	0	661.064	182.1	23.2324	Neg
EA362	0	802.16	125.6	Neg	Neg
EA363	0	1121.37	421	Neg	Neg
EA364	0	520.411	202.7	Neg	Neg
EA365	50	385.879	339	21.3633	18.9095
EA366	0	557.724	333.2	Neg	Neg
EA367	0	484.347	222.9	Neg	Neg
EA368	0	1461.25	353	Neg	Neg
EA369	40	395.562	209.8	19.4426	17.1225
EA370	0	503.399	238.8	Neg	Neg
EA371	3.33333	1019.24	330.9	Neg	Neg
EA372	3.33333	439.507	153.6	Neg	24.156
EA373	0	1137.81	111.6	23.7863	21.8616
EA374	0	927.52	226.1	Neg	Neg
EA375	0	281.258	86.7	Neg	Neg
EA376	0	1254.28	407.5	Neg	Neg
EA377	10	458.276	281.6	22.4816	18.097
EA378	0	1010.73	243.1	Neg	Neg
EA379	0	324.181	158.7	Neg	Neg
EA380	0	813.752	391.1	24.2237	31.5296
EA381	0	2252.8	189.4	Neg	Neg
EA382	0	311.366	114.7	Neg	Neg
EA383	0	241.537	39.1	Neg	Neg
EA384	0	143.563	112.1	Neg	Neg
EA385	0	510.535	270.8	Neg	Neg
EA386	0	296.162	224.5	Neg	Neg
EA387	0	755.198	248.7	Neg	Neg
EA388	0	1319.04	411.3	Neg	Neg
EA389	30	673.748	127.5	22.411	20.9539
EA390	0	606.034	248	Neg	Neg
EA391	0	416.231	254.5	22.7076	19.1951
EA392	0	399.915	428.8	Neg	Neg
EA393	0	465.623	219.4	Neg	Neg
EA394	0	492.933	178.7	Neg	Neg
EA395	0	1202.59	351.3	Neg	Neg
EA396	63.3333	497.471	247.7	23.4786	20.9787
EA397	0	1203.83	285.6	Neg	Neg
EA398	0	379.366	73.4	Neg	Neg
EA399	0	274.45	331.4	Neg	Neg
EA400	0	226.182	648.6	Neg	Neg
EA401	0	273.73	250.3	Neg	Neg
EA402	0	564.858	69.5	Neg	Neg
EA403	0	631.585	96.9	Neg	Neg
EA404	0	658.487	356.1	Neg	Neg
EA405	0	466.072	232.6	Neg	Neg
EA406	0	628.375	110.4	Neg	Neg
EA407	46.6667	514.147	337.4	21.3401	19.3705
EA408	0	456.223	341.6	Neg	Neg
EA409	10	513.479	271.6	24.1227	Neg
EA410	0	521.731	206.9	Neg	Neg
EA411	0	177.06	110.8	Neg	Neg
EA412	0	364.331	262.7	Neg	Neg
EA413	0	289.888	375	24.729	22.7548
EA414	0	997.524	239.8	Neg	Neg
EA415	13.3333	381.137	121.9	25.3896	20.1042
EA416	0	1203.25	278.3	Neg	Neg
EA417	0	446.315	195.2	Neg	Neg
EA418	0	964.031	312.8	Neg	Neg
EA419	0	196.98	227.4	Neg	Neg
EA420	0	118.342	259.1	26.3657	20.8391
EA421	0	423.544	217.5	Neg	32.7822
EA422	0	260.513	124.5	Neg	Neg
EA423	0	235.458	53.5	Neg	Neg
EA424	0	424.133	111.5	Neg	Neg
EA425	0	773.735	203.9	Neg	Neg
EA426	0	570.068	71.2	Neg	Neg
EA427	26.6667	866.436	437.4	22.5655	19.6201
EA428	0	469.242	409.1	Neg	Neg
EA429	5	367.93	494.1	Neg	Neg
EA430	0	225.342	317	Neg	Neg
EA431	40	1486.19	606.3	18.1482	17.0644
EA432	23.3333	100.489	69.4	26.2577	21.0095
EA433	0	601.11	425.3	Neg	Neg
EA434	0	1329.58	503.5	34.6085	34.5979
EA435	0	540.117	230.6	Neg	Neg
EA436	0	562.472	280.7	26.9811	34.4689
EA437	0	357.013	284.2	Neg	Neg
EA438	0	106.475	156.9	Neg	Neg
EA439	13.3333	591.537	419.8	34.8244	22.9545
EA440	0	1291.47	348.7	Neg	Neg
EA441	0	377.777	395.7	Neg	Neg
EA442	0	1043.31	259.9	Neg	Neg
EA443	3.33333	870.035	486.6	Neg	Neg
EA444	13.3333	1392.31	436.4	21.9192	20.9215
EA445	0	991.557	348.5	Neg	Neg
EA446	0	490.205	304.1	23.8548	19.2393
EA447	0	845.288	273.9	Neg	33.6222
EA448	0	555.283	217.8	Neg	Neg
EA449	0	272.613	339.7	Neg	Neg
EA450	13.3333	445.531	329.8	26.7391	Neg
EA451	0	960.705	161.9	Neg	Neg
EA452	13.3333	582.747	387.7	27.8408	21.425
EA453	0	594.658	139.2	Neg	Neg
EA454	10	693.005	490.1	Neg	Neg
EA455	10	223.482	236.6	28.0519	21.3976
EA456	0	563.785	410.7	Neg	Neg
EA457	0	480.751	168.7	28.3197	Neg
EA458	0	749.865	350.1	Neg	Neg
EA459	0	676.359	173.6	Neg	Neg
EA460	0	445.826	210.6	23.3326	28.0391
EA461	0	182.307	134.1	Neg	Neg
EA462	0	68.705	21.5	Neg	Neg
EA463	0	294.024	157.1	Neg	Neg
EA464	0	288.465	64.2	Neg	Neg
EA465	0	714.658	654.4	Neg	Neg
EA466	0	266.788	626.6	Neg	Neg
EA467	0	350.849	72.9	Neg	Neg
EA468	0	611.374	693.8	Neg	Neg
EA469	0	466.893	211.2	Neg	Neg
EA470	0	228.875	141.3	24.8455	28.8521
EA471	0	176.561	81.5	Neg	31.3306
EA472	0	424.124	424.5	Neg	Neg
EA473	0	981.474	653.1	23.6385	30.4704
EA474	0	973.602	589.8	Neg	Neg
EA475	0	639.964	137.3	Neg	Neg
EA476	0	790.301	490.3	34.8121	Neg
EA477	0	225.609	61.6	Neg	Neg
EA478	0	768.826	389.3	Neg	Neg
EA479	0	632.05	179	Neg	Neg
EA480	0	1571.23	396.8	Neg	32.8582
EA481	0	342.185	187.7	25.5679	23.1964
EA482	6.66667	267.478	478.9	35.0267	Neg
EA483	0	556.17	332.1	Neg	Neg
EA484	0	204.737	131.6	Neg	Neg
EA485	0	241.731	210.5	Neg	32.7841
EA486	0	302.844	205.6	Neg	Neg
EA487	0	961.069	192.4	Neg	Neg
EA488	0	621.585	387	27.3567	26.0845
EA489	0	394.697	84.1	Neg	Neg
EA490	0	462.012	461.8	Neg	Neg
EA491	0	536.898	165.3	Neg	Neg
EA492	50	106.949	58	22.4845	20.3261
EA493	0	638.591	77.1	Neg	Neg
EA494	5	1066.12	538	Neg	Neg
EA495	0	699.136	365.9	Neg	Neg
EA496	0	404.323	125	Neg	Neg
EA497	0	443.801	705.4	Neg	Neg
EA498	0	846.998	476.1	23.8182	19.1869
EA499	0	1017.61	429.8	Neg	34.8655
EA500	0	794.952	411.2	28.1763	20.2785
EA501	0	1249.37	422.2	Neg	Neg
EA502	0	754.008	648.4	Neg	Neg
EA503	0	407.893	82.5	Neg	Neg
EA504	0	225.099	97.5	Neg	Neg
EA505	0	686.903	31.3	34.223	Neg
EA506	6.66667	422.46	225.1	Neg	21.4042
EA507	0	1165.39	658.1	Neg	15.8583
EA508	0	1029.89	442.1	Neg	32.1959
EA509	0	1073.52	447.5	Neg	Neg
EA510	0	453.734	125.2	Neg	Neg
EA511	0	651.362	389.1	Neg	Neg
EA512	6.66667	188.684	76.5	21.6974	21.3934
EA513	6.66667	1027.72	94.1	Neg	Neg
EA514	6.66667	1023.82	498	24.0519	21.6395
EA515	0	1054.83	163.1	Neg	34.6529
EA516	0	605.64	359.2	Neg	Neg
EA517	0	401.283	138.5	Neg	Neg
EA518	10	496.46	27.6	Neg	Neg
EA519	0	1051.14	437.9	Neg	Neg
EA521	5	337.579	136.7	24.7962	21.261
EA522	0	146	286.8	Neg	Neg
EA523	3.33333	1081.84	129.2	Neg	Neg
EA524	3.33333	2752.28	626.9	Neg	Neg
EA525	0	445.653	102.6	Neg	Neg
EA526	0	219.122	147.6	Neg	Neg
EA527	0	541.077	210.8	Neg	Neg
EA528	0	1273.84	520.8	26.7183	Neg
EA529	0	354.906	21.5	34.2609	Neg
EA530	10	647.835	207.2	Neg	32.8787
EA531	0	519.729	215	Neg	Neg
EA532	0	1288.65	227.4	Neg	34.5858
EA533	0	1463.49	301.9	Neg	Neg
EA534	0	1787.73	482.3	19.9901	18.4354
EA535	0	887.887	728.7	Neg	Neg
EA536	0	1120.41	201.6	Neg	Neg
EA537	0	333.025	255.8	Neg	Neg
EA538	0	1173.84	561.7	Neg	Neg
EA539	0	806.63	88.6	Neg	Neg
EA540	0	328.333	119.3	34.4695	30.9489
EA541	0	164.229	246.1	Neg	Neg
EA542	0	503.049	402.4	Neg	Neg
EA543	3.33333	494.99	319.4	32.811	25.5722
EA544	0	682.086	534.3	Neg	Neg
EA545	6.66667	301.53	204	Neg	28.1616
EA546	0	258.193	106.9	Neg	Neg
EA547	0	560.166	252.9	Neg	34.0163
EA548	3.33333	553.29	317.2	Neg	Neg
EA549	6.66667	905.65	331.7	Neg	Neg
EA550	6.66667	978.92	377	Neg	Neg
EA551	0	391.004	532.5	Neg	Neg
EA552	0	680.927	384.5	Neg	Neg
EA553	23.3333	387.18	371.6	Neg	Neg
EA554	0	257.449	397.1	Neg	Neg
EA555	0	462.47	478.6	Neg	Neg
EA556	0	534.397	249.1	Neg	33.4324
EA557	0	197.349	541.2	Neg	34.0101
EPG Eggs per gram of faeces, KK Kato-Katz, Neg Negative.

## Sheet: S2
Table S2. Schistosoma japonicum positivity rates and descriptive statistics for the positive cases identified by the different diagnostic methods
Method	Positive cases/total	Positivity rate (%) (95% CI)	P * (McNemar’s test)	EPG (KK)/Ct-values (qPCR)
				Minimum	Median	Maximum
KK	139/554	25.1 (21.7—28.9)	< 0.0001	3.33	10	1060
SjTR1-qPCR-S1	141/554	25.5 (22.0—29.2)	< 0.0001	17.899	23.818	35.104
SjTR1-qPCR-S2	165/554	29.8 (26.1—33.7)	< 0.0001	14.613	22.035	34.987
qPCR combined	181/554	32.7 (28.9—36.7)	< 0.0001	N/A	N/A	N/A
KK/qPCR combined	217/554	39.2 (35.2—43.3)		N/A	N/A	N/A
CI Confidence interval, EPG Eggs per gram of faeces, KK Kato-Katz, N/A Not appliable.
* Compared with KK/qPCR combined

## Sheet: S3
Table S3. Comparison of Ct values in testing concentration-matched DNA samples between the two SjTR1-qPCR systems
#	KK (Schistosoma japonicum EPG)	Ct value (SjTR1-qPCR-S1)	Ct value (SjTR1-qPCR-S2)
EA001	240	20.9276	19.5716
EA002	3.33333	26.2057	24.3256
EA008	13.3333	26.1384	23.4351
EA029	93.3333	19.2431	17.3463
EA062	10	23.926	21.3284
EA075	6.66667	24.5536	20.6883
EA081	20	28.0705	28.2378
EA084	3.33333	24.8834	24.9965
EA112	6.66667	22.329	29.7264
EA138	33.3333	22.2284	20.2551
EA144	3.33333	27.5241	22.3135
EA156	26.6667	18.1257	18.6402
EA164	0	29.561	33.8665
EA170	40	23.1743	25.2589
EA189	150	20.5091	24.448
EA191	43.3333	20.6708	28.0626
EA216	40	18.4816	16.4488
EA230	70	19.7213	19.0389
EA234	15	21.4377	25.8416
EA235	0	26.3328	27.536
EA247	26.6667	25.2602	22.8351
EA251	0	25.2644	24.5499
EA285	383.333	20.953	19.8885
EA286	156.667	18.9477	17.6254
EA295	13.3333	23.5741	32.1777
EA301	16.6667	21.6628	20.2698
EA310	30	32.279	24.0476
EA314	0	30.9909	20.2683
EA316	13.3333	21.7215	19.1641
EA326	56.6667	28.7895	24.1086
EA333	0	35.0348	21.237
EA336	20	24.0324	21.8975
EA356	6.66667	22.139	25.0995
EA373	0	23.7863	20.9385
EA377	10	22.4816	20.1813
EA391	0	22.7076	21.1707
EA396	63.3333	23.4786	22.6846
EA413	0	24.729	26.0473
EA420	0	26.3657	23.9027
EA431	40	18.1482	18.2523
EA434	0	34.6085	35.0682
EA444	13.3333	21.9192	21.6333
EA446	0	23.8548	20.9621
EA473	0	23.6385	33.685
EA481	0	25.5679	26.2991
EA492	50	22.4845	22.9976
EA498	0	23.8182	21.9837
EA514	6.66667	24.0519	24.3104
EA534	0	19.9901	20.8545
EA540	0	34.4695	34.0213
EPG Eggs per gram of faeces, KK Kato-Katz.

## Sheet: S4
Table S4. Ct values for positive copro-DNA-SjTR1-qPCR results stratified by Schistosoma japonicum infection status and intensity
SjTR1-qPCR-S1				SjTR1-qPCR-S2
KK-P			KK-N	KK-P			KK-N
≥ 100 EPG (n = 10)	10-99 EPG (n = 62)	1-9 EPG (n = 22)	0 EPG (n = 47)	≥ 100 EPG (n = 10)	10-99 EPG (n = 61)	1-9 EPG (n = 27)	0 EPG (n = 67)
21.354	19.243	23.801	19.99	18.941	15.33	21.064	34.987
19.023	19.914	21.664	21.859	18.715	20.122	18.301	34.866
17.899	20.994	22.886	21.867	15.341	18.207	26.299	34.837
20.953	23.557	24.554	22.104	19.454	18.132	18.718	34.673
19.35	20.737	22.329	22.218	18.462	20	22.093	34.653
20.928	19.116	24.611	22.708	19.776	18.002	26.593	34.621
18.948	19.721	26.216	22.863	16.613	20.979	21.583	34.598
20.442	23.479	26.002	23.01	18.519	18.563	22.131	34.586
20.509	22.4	21.735	23.232	22.483	22.035	20.123	34.469
18.931	25.61	22.139	23.333	16.922	23.957	20.576	34.417
	28.79	35.027	23.586		21.674	25.009	34.37
	20.112	21.697	23.638		20.312	21.404	34.275
	21.925	24.052	23.786		18.91	21.393	34.016
	21.363	24.796	23.818		20.326	21.639	34.01
	22.485	26.206	23.855		20.978	28.162	33.622
	18.22	24.556	24.224		19.371	21.261	33.579
	21.34	24.883	24.348		18.694	22.514	33.432
	24.557	22.39	24.436		27.451	22.099	33.408
	20.671	27.524	24.708		22.87	24.804	32.858
	27.17	29.116	24.729		22.773	23.132	32.784
	23.174	26.485	24.776		14.613	23.425	32.782
	18.482	32.811	24.845		17.122	21.413	32.777
	19.443		25.154		17.064	19.735	32.196
	18.148		25.247		17.264	21.398	31.728
	22.228		25.264		23.414	23.996	31.53
	21.693		25.568		19.325	24.156	31.37
	21.434		25.573		20.991	25.572	31.331
	24.011		26.137		24.227		30.949
	32.279		26.333		20.954		30.47
	22.411		26.366		17.758		30.415
	22.637		26.391		14.903		28.852
	18.126		26.718		26.316		28.564
	25.803		26.981		21.094		28.102
	25.26		27.357		19.62		28.039
	22.565		27.986		21.01		27.486
	26.258		28.176		18.064		27.157
	20.074		28.32		24.753		26.736
	28.07		29.561		21.912		26.085
	24.032		30.991		17.835		26.009
	28.851		31.888		19.092		25.881
	21.663		33.758		23.846		25.385
	24.645		34.223		21.373		24.963
	21.438		34.261		27.675		23.842
	26.138		34.47		28.769		23.196
	23.562		34.609		18.855		22.952
	23.574		34.812		26.651		22.755
	21.722		35.035		20.104		22.732
	25.39				22.955		22.529
	34.824				20.922		22.349
	21.919				21.425		21.862
	26.739				27.247		21.792
	27.841				19.328		21.53
	35.104				19.395		21.435
	23.926				20.157		21.369
	26.044				21.847		20.883
	23.206				23.414		20.839
	23.301				20.957		20.58
	23.412				34.698		20.278
	23.689				18.097		19.835
	22.482				21.398		19.634
	24.123				32.879		19.239
	28.052						19.22
							19.195
							19.187
							18.825
							18.435
							15.858
EPG Eggs per gram of faeces, KK-P Kato-Katz-positive, KK-N Kato-Katz-negative.

## Sheet: S5
Table S5. Results of retesting selected DNA samples extracted using the NaOH-based method after dilution
#	KK (Schistosoma japonicum EPG)	Ct value (SjTR1-qPCR-S1)	Ct value (SjTR1-qPCR-S2)	Ct value after retesting (SjTR1-qPCR-S2)
EA011	10	Neg	Neg	Neg
EA015	3.33333	Neg	Neg	Neg
EA024	3.33333	Neg	Neg	Neg
EA031	3.33333	Neg	Neg	Neg
EA046	5	Neg	Neg	Neg
EA050	13.3333	Neg	Neg	Neg
EA054	3.33333	Neg	Neg	Neg
EA094	0	22.1041	Neg	Neg
EA100	6.66667	Neg	Neg	Neg
EA119	3.33333	Neg	Neg	Neg
EA130	6.66667	Neg	Neg	Neg
EA153	16.6667	28.851	Neg	21.75
EA157	3.33333	Neg	Neg	Neg
EA158	3.33333	Neg	Neg	Neg
EA177	6.66667	Neg	Neg	Neg
EA183	3.33333	Neg	Neg	Neg
EA190	3.33333	Neg	Neg	Neg
EA195	3.33333	Neg	Neg	Neg
EA201	3.33333	Neg	Neg	Neg
EA214	3.33333	Neg	Neg	Neg
EA221	0	24.4359	Neg	Neg
EA222	10	Neg	Neg	33.9856
EA236	3.33333	Neg	Neg	Neg
EA256	0	24.7079	Neg	Neg
EA274	10	Neg	Neg	Neg
EA283	90	20.994	Neg	Neg
EA296	0	24.3478	Neg	Neg
EA302	6.66667	Neg	Neg	Neg
EA346	0	21.8591	Neg	34.5268
EA354	6.66667	Neg	Neg	Neg
EA361	0	23.2324	Neg	34.6864
EA371	3.33333	Neg	Neg	Neg
EA409	10	24.1227	Neg	24.5239
EA429	5	Neg	Neg	34.4575
EA443	3.33333	Neg	Neg	Neg
EA450	13.3333	26.7391	Neg	Neg
EA454	10	Neg	Neg	Neg
EA457	0	28.3197	Neg	Neg
EA476	0	34.8121	Neg	Neg
EA482	6.66667	35.0267	Neg	28.0003
EA494	5	Neg	Neg	Neg
EA505	0	34.223	Neg	Neg
EA513	6.66667	Neg	Neg	Neg
EA518	10	Neg	Neg	Neg
EA523	3.33333	Neg	Neg	Neg
EA524	3.33333	Neg	Neg	Neg
EA528	0	26.7183	Neg	Neg
EA529	0	34.2609	Neg	Neg
EA548	3.33333	Neg	Neg	Neg
EA549	6.66667	Neg	Neg	34.4721
EA550	6.66667	Neg	Neg	Neg
EA553	23.3333	Neg	Neg	Neg
EA014	0	Neg	Neg	Neg	brown
EA025	0	Neg	Neg	Neg	brown
EA026	0	Neg	33.4077	Neg	brown
EA046	5	Neg	Neg	Neg	brown
EA131	0	Neg	Neg	Neg	brown
EA153	16.6667	28.851	Neg	21.75	brown
EA174	3.33333	29.1155	21.398	24.7549	brown
EA193	0	22.8626	21.5303	25.2759	brown
EA201	3.33333	Neg	Neg	Neg	brown
EA222	10	Neg	Neg	33.9856	brown
EA266	0	26.1369	28.1023	26.591	brown
EA277	0	Neg	Neg	Neg	brown
EA313	0	Neg	Neg	24.729	brown
EA314	0	30.9909	18.8249	23.0255	brown
EA333	0	35.0348	21.369	24.0729	brown
EA340	0	Neg	Neg	Neg	brown
EA349	0	Neg	Neg	Neg	brown
EA351	0	Neg	Neg	Neg	brown
EA353	0	Neg	Neg	Neg	brown
EA400	0	Neg	Neg	Neg	brown
EA408	0	Neg	Neg	30.6848	brown
EA409	10	24.1227	Neg	24.5239	brown
EA429	5	Neg	Neg	34.4575	brown
EA494	5	Neg	Neg	Neg	brown
EA537	0	Neg	Neg	Neg	brown
EPG Eggs per gram of faeces, KK Kato-Katz, Neg Negative.

## Sheet: S6
Table S6. Agreement analysis between the Kato-Katz and copro-DNA-SjTR1-qPCR systems
		SjTR1-qPCR-S1			Kappa index (95% CI)
		(+)	(−)	Total
KK	(+)	94	45	139	0.560 (0.4810−0.640)
	(−)	47	368	415
	Total	141	413	554
		SjTR1-qPCR-S2			Kappa index (95% CI)
		(+)	(−)	Total
KK	(+)	98	41	139	0.512 (0.432−0.591)
	(−)	67	348	415
	Total	165	389	554
		SjTR1-qPCR-S1			Kappa index (95% CI)
		(+)	(−)	Total
SjTR1-qPCR-S2	(+)	125	40	165	0.748 (0.686−0.810)
	(−)	16	373	389
	Total	141	413	554
CI Confidence interval, KK Kato-Katz.

## Sheet: S7
Table S7. Comparison of different commercial purification kits in isolating NaOH-extracted crude DNA
Sample ID	KK (Schistosoma japonicum EPG)	Conc (Q)	Conc (M)	Conc (T)	Ct (Q)	Ct (M)	Ct (T)
		(ng/µl)	(ng/µl)	(ng/µl)
1	0	239	502.5	75.6	23.275	Neg	28.085
2	0	57.9	78.7	93.4	Neg	Neg	Neg
3	10	164	377.8	276	34.854	Neg	Neg
4	35	76.1	89.6	101.1	17.416	17.706	17.323
5	43.3	138.6	466.8	171.7	21.796	21.832	21.697
6	73.3	56	191.8	78.5	16.198	17.307	16.431
7	3.3	102	355.9	133	35.014	Neg	34.8
8	6.7	409	369.8	341.8	Neg	Neg	34.227
9	13.3	176	255.1	358.6	30.123	Neg	Neg
10	290	70	245.4	131	16.384	Neg	17.697
11	96.7	228	186.6	350.7	21.172	Neg	Neg
12	106.7	27	109.4	39	22.386	21.92	21.871
13	63.3	160.6	192.2	184	18.819	19.907	19.251
14	33.3	74	179.8	93.7	19.201	19.107	18.863
15	306.7	28	33.9	46.1	15.154	16.949	15.774
16	5	443.8	436.4	510.8	32.728	33.959	32.718
17	3.3	27.4	201.9	60.1	21.989	21.089	21.538
18	10	155	227.2	219	17.608	19.146	18.137
19	10	180	352.2	303	25.492	25.144	25.004
20	30	114.3	212.1	116.3	24.246	24.673	24.996
21	5	43	89.8	87	19.335	20.028	19.202
22	140	202	150.5	268.1	19.58	19.909	19.443
23	5	47	97.8	49	35.032	Neg	Neg
24	10	204	214.4	319	26.627	27.804	27.229
Median	11.7	126.5	207	132	19.580#	20.028#	19.443#
KK Kato-Katz, EPG Eggs per gram of faeces, Conc (Q), Conc (M), and Conc (T): Concentration of DNA isolated using the QIAamp DNA Mini kit, Maxwell Blood DNA kit and TIANgel Purification kit, respectively. Ct (Q), Ct (M) and Ct (T): Ct values for testing DNA isolated using the QIAamp DNA Mini kit, Maxwell Blood DNA kit and TIANgel Purification kit, respectively. Neg Negative. # Median Ct value from…
